# THE AMERICAN JOURNAL OF PSYCHIATRY

## EDITOR-IN-CHIEF

Robert Freedman, M.D.

## DEPUTY EDITORS

David A. Lewis, M.D.

Robert Michels, M.D.

Daniel S. Pine, M.D.

Susan K. Schultz, M.D.

Carol A. Tamminga, M.D.

## EDITORIAL STAFF

**Executive Editor**  
Michael D. Roy

**Senior Editor/Features Writer**  
Jane Weaver, E.L.S.

**Senior Editor**  
John J. Guardiano, Ph.D.

**Production Manager**  
Susan Westrate

**Assistant Editors**  
Katie Duffy  
Angela Moore

**Editorial Support Services  
Manager**  
Nicole Gray

**Editorial Assistant**  
Linda LaCour

**Editorial Assistant/  
Permissions Coordinator**  
Heidi Koch

**Assistants to the Editors**  
Lois Lilienthal  
Laura English  
Rachel Hogg  
Russell A. Scholl

## ASSOCIATE EDITORS

Alan Brown, M.D., M.P.H.

Linda Brzustowicz, M.D.

Tyrone Cannon, Ph.D.

Benjamin G. Druss, M.D., M.P.H.

Graham J. Emslie, M.D.

Daniel C. Javitt, M.D.

Bankole Johnson, M.D.

Ellen Leibenluft, M.D.

Douglas F. Levinson, M.D.

Constantine G. Lyketsos,  
M.D., M.H.S.

Barbara Milrod, M.D.

Jerrold F. Rosenbaum, M.D.

A. John Rush, M.D.

Patricia Suppes, M.D., Ph.D.

Anita Thapar, M.B.B.Ch.,  
F.R.C.Psych., Ph.D., F.Med.Sci.

Mauricio Tohen, M.D.,  
Dr.PH., M.B.A.

Eduard Vieta, M.D., Ph.D.

## EDITOR EMERITA

Nancy C. Andreasen, M.D., Ph.D.

## FORMER EDITORS

Amariah Brigham, M.D.  
1844-1849

T. Romeyn Beck, M.D.  
1849-1854

John P. Gray, M.D.  
1854-1886

G. Alder Blumer, M.D.  
1886-1894

Richard Dewey, M.D.  
1894-1897

Henry M. Hurd, M.D.  
1897-1904

Edward N. Brush, M.D.  
1904-1931

Clarence B. Farrar, M.D.  
1931-1965

Francis J. Braceland, M.D.  
1965-1978

John C. Nemiah, M.D.  
1978-1993

# THE AMERICAN PSYCHIATRIC ASSOCIATION

1000 Wilson Blvd., Suite 1825, Arlington, VA 22209-3901  
(888) 357-7924 (toll-free inside the U.S. and Canada) / (703) 907-7300  
web site: [www.psychiatry.org](http://www.psychiatry.org) • e-mail: [apa@psych.org](mailto:apa@psych.org)

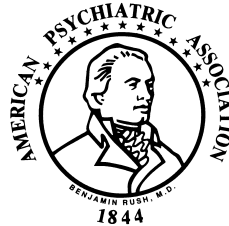

## OFFICERS 2014–2015

|                 |                        |
|-----------------|------------------------|
| President       | Paul Summergrad, M.D.  |
| President-Elect | Renée L. Binder, M.D.  |
| Treasurer       | Frank W. Brown, M.D.   |
| Secretary       | Maria A. Oquendo, M.D. |

## ASSEMBLY

|               |                                   |
|---------------|-----------------------------------|
| Speaker       | Jenny L. Boyer, M.D., Ph.D., J.D. |
| Speaker-Elect | Glenn A. Martin, M.D.             |
| Recorder      | Daniel J. Anzia, M.D.             |

## OFFICE OF THE CEO AND MEDICAL DIRECTOR

CEO and Medical Director    Saul Levin, M.D., M.P.A.

## BOARD OF TRUSTEES

|                         |                                 |                        |
|-------------------------|---------------------------------|------------------------|
| Jeffrey Akaka, M.D.     | Jeffrey L. Geller, M.D., M.P.H. | John M. Oldham, M.D.   |
| R. Scott Benson, M.D.   | Dilip V. Jeste, M.D.            | Vivian B. Pender, M.D. |
| Lara J. Cox, M.D., M.S. | Judith F. Kashtan, M.D.         | Gail E. Robinson, M.D. |
| Brian Crowley, M.D.     | Jeffrey A. Lieberman, M.D.      | Ravi N. Shah, M.D.     |
| Anita S. Everett, M.D.  | Molly K. McVoy, M.D.            | Melinda Young, M.D.    |

## PUBLISHER

Rebecca D. Rinehart

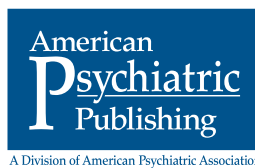

The American Journal of Psychiatry is online at [ajp.psychiatryonline.org](http://ajp.psychiatryonline.org)

# THE AMERICAN PSYCHIATRIC ASSOCIATION

## Chairpersons of Councils, Commissions, Committees, and Task Forces

### Standing Committees

---

**Bylaws**

Rebecca W. Brendel, M.D., J.D.

**Elections**

Barry K. Herman, M.D.

**Ethics**

Richard D. Milone, M.D.

**Finance and Budget**

Alan F. Schatzberg, M.D.

**Audit**

Frank W. Brown, M.D.

**Investment Oversight**

David Fassler, M.D.

**Joint Reference**

Renée L. Binder, M.D.

**Membership**

Rahn K. Bailey, M.D.

**Nominating**

Jeffrey A. Lieberman, M.D.

**Tellers**

Hind Benjelloun, M.D.

---

**Council on Addiction Psychiatry**

---

Frances R. Levin, M.D.

---

**Council on Advocacy and Government Relations**

---

Barry B. Perlman, M.D.

*Advocacy and Litigation Funding*

Jack Drescher, M.D.

*Caucus of State Hospital Psychiatrists**Caucus of VA Psychiatrists*

---

**Council on Children, Adolescents, and Their Families**

---

Louis J. Kraus, M.D.

*Agnes Purcell McGavin Award*

Christopher J. McDougale, M.D.

*Blanche F. Ittleson Research Award**Caucus of Psychiatrists Treating Persons With Intellectual Disabilities**College Mental Health Caucus*

---

**Council on Communications**

---

Raymond J. DePaulo, M.D.

---

**Council on Geriatric Psychiatry**

---

Robert P. Roca, M.D.

---

**Council on Healthcare Systems and Financing**

---

Harsh K. Trivedi, M.D.

*Reimbursement for Psychiatric Care*

Bruce J. Schwartz, M.D.

*RBRVS, Codes and Reimbursement*

Ronald M. Burd, M.D.

---

**Council on International Psychiatry**

---

Dilip V. Jeste, M.D.

*Caucus on Global Mental Health and Psychiatry*

---

**Council on Medical Education and Lifelong Learning**

---

Richard F. Summers, M.D.

*APA Public Psychiatry Fellowship Selection Committee*

Christina V. Mangurian, M.D.

*APA/SAMHSA Minority Fellowship Selection and Advisory*

Altha J. Stewart, M.D.

*Caucus on MOC Issues**Caucus of Resident-Fellow Members**Scientific Program*

Philip R. Muskin, M.D.

*Scientific Program Committee of the Institute on Psychiatric Services*

Hunter L. McQuiston, M.D.

*Subcommittee on Joint Sponsorship of Continuing Medical Education (CME)**Vestermark Award Committee*

Jonathan F. Borus, M.D.

---

**Council on Minority Mental Health and Health Disparities**

---

Sandra C. Walker, M.D.

*Caucus of Rural Psychiatrists**Caucus on Religion, Spirituality and Psychiatry*

---

**Council on Psychiatry And Law**

---

Steven K. Hoge, M.D.

*Caucus of Correctional Psychiatrists**Isaac Ray/Human Rights Award*

Mardoche Sidor, M.D.

*Judicial Action*

Paul S. Appelbaum, M.D.

*Manfred S. Guttmacher Award*

David A. Lowenthal, M.D.

---

**Council on Psychosomatic Medicine (Consultation Liaison Psychiatry)**

---

David F. Gitlin, M.D.

---

**Council on Quality Care**

---

Joel Yager, M.D.

*Mental Health Information Technology*

Steven Roy Daviss, M.D.

*Steering Committee on Practice Guidelines*

Michael J. Vergare, M.D.

---

**Council on Research**

---

Dwight L. Evans, M.D.

*Caucus of Psychiatrists Treating Persons with Eating Disorders**Caucus on Alternative and Complementary Medicine**Psychiatric Dimensions of Disasters*

Charles R. Marmar, M.D.

*Research Awards*

B. Timothy Walsh, M.D.

*Task Force to Revise the Practice of Electroconvulsive Therapy*

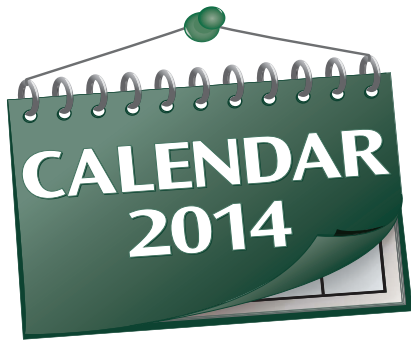

For free listing of your organization's official annual or regional meeting, please send us the following information: sponsor, location, inclusive dates, type and number of continuing education credits (if available), and the name, address, and telephone number of the person or group to contact for more information. In order for an event to appear in our listing, all notices and changes must be received at least 6 months in advance of the meeting and should be addressed to:

**Calendar, American Journal of Psychiatry, 1000 Wilson Boulevard, Suite 1825, Arlington, VA 22209-3901, [swestate@psych.org](mailto:swestate@psych.org) (e-mail).**

Because of space limitations, only listings of meetings of the greatest interest to Journal readers may be included.

## AUGUST

**August 21–23**, 6th International Conference on Schizophrenia VI (IConSVI), Chennai, India. Organized by Schizophrenia Research Foundation (SCARF) and co-sponsored by WPA, WASP, and IPS. Contact [www.iconsoscarf.org](http://www.iconsoscarf.org) (web site).

## SEPTEMBER

**September 10–12**, The International Marcé Society for Perinatal Mental Health Conference, Swansea, Wales. [www.swansea.ac.uk/marce/](http://www.swansea.ac.uk/marce/) (web site).

## OCTOBER

**October 11–12**, 15th Joint Meeting, American Academy of Psychoanalysis and Dynamic Psychiatry (AAPDP) with Organizzazione di Psicoanalisti Italiani Federazione e Registro (OPI-FER), Pisa, Italy. Contact: [info@AAPDP.org](mailto:info@AAPDP.org) (e-mail), [www.AAPDP.org](http://www.AAPDP.org) (web site).

**October 16–18**, Third International Congress on Borderline Personality Disorder and Allied Disorders (Tailoring treatments to different developmental pathways and phenomenologies), European Society for the Study of Personality Disorders (ESSPD) with International Society for the Study of Personality Disorder (ISSPD), Rome, Italy. Contact: [borderline2014@cpo-hanser.de](mailto:borderline2014@cpo-hanser.de) (e-mail), [www.esspd.eu](http://www.esspd.eu) (web site),

[www.borderline-congress.org](http://www.borderline-congress.org) (conference information).

**October 30–November 2**, 66th Institute on Psychiatric Services, San Francisco, CA. [www.psychiatry.org/ips](http://www.psychiatry.org/ips) (web site).

## FEBRUARY 2015

**February 16–19**, Update on Psychiatry: Continuing a Proud 23 Year Tradition. JW Marriott Starr Pass Resort, Tucson, Arizona. Sponsored by: Univ. of Arizona College of Medicine, Department of Psychiatry; Arizona Psychiatric Society; Arizona Psychological Association. Contact: [uapsycon@email.arizona.edu](mailto:uapsycon@email.arizona.edu) (e-mail); (520) 626-1392 (phone); [www.psychopharm.arizona.edu](http://www.psychopharm.arizona.edu) (web site).

## An essential digital companion to the DSM-5®

*NEW! – Now Spanish language supported!*

### DSM-5® Diagnostic Criteria Mobile App

American Psychiatric Association

The **DSM-5® Diagnostic Criteria Mobile App** is designed to help mental health practitioners, researchers and students fully integrate the new DSM criteria and codes into their practice and study. Users have full offline access to all of the criteria sets as well as online access to supporting videos, commentary and resources. Powerful search and customization tools aid and enhance assessment of symptom presentations in a variety of clinical and administrative settings. It features:

- Access to the complete DSM-5® diagnostic criteria sets on your phone and tablet
- Up to date access to ICD-9-CM and ICD-10-CM codes for clinical and administrative use
- Video commentary from the DSM-5 task force members highlighting changes from DSM-IV to DSM-5
- Robust disorder, acronym, code and symptom search functionality
- Bookmarking allows customization of the criteria sets most commonly referenced

Available for both iOS and Android compatible devices through the iTunes store and Google Play.

As the DSM-5® Diagnostic Criteria Mobile App is only available for sale through the iTunes and Android stores, it is not possible for us to extend our traditional APA Member or APA Resident-Fellow Member discounts on the purchase of this product.

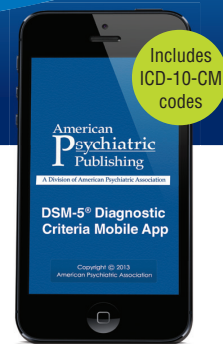

# There's So Much More to AJP Than Meets the Page!

Visit *The American Journal of Psychiatry's* website on PsychiatryOnline for the following features!

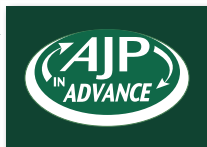

## AJP in Advance

**The very latest research advances!**

At **AJP in Advance**, you can discover the following before their appearance in print:

### Relapse-Prevention CBT to Improve Outcomes in Pediatric Depression

For children and adolescents with depression, especially youths at risk for multiple episodes, the risk of relapse may be reduced by adding sequential cognitive-behavioral therapy, as opposed to continuation pharmacotherapy alone, after a successful antidepressant response.

### Varenicline and Bupropion in Smoking Cessation

Combining varenicline and bupropion more than doubled the end-of-treatment abstinence rate for male smokers and highly dependent smokers when compared with varenicline treatment alone, and abstinence persisted to the 6-month follow-up.

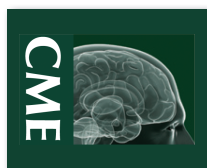

## AJP CME

Three articles in this issue form the basis of a short course with questions that can be answered for up to 1 *AMA PRA Category 1 Credit™* each by visiting <http://psychiatryonline.org/cme.aspx> and clicking on the "American Journal of Psychiatry" tab.

CME credit is issued only online, and a paid subscription to AJP CME course program is required. This month's courses appear on pages 893–896.

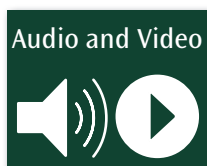

## Have You Heard?

With AJP Audio you can listen to highlights of this issue. This month, Deputy Editor Susan K. Schultz, M.D., discusses delirium with manic symptoms in end-stage COPD, a clinical vignette of depression in a Shia Muslim woman in Iran, mindfulness training for Marines preparing for deployment, unexpected death of a loved one in relation to psychiatric disorders across the life course, the influences of paternal versus maternal PTSD on epigenetic regulation of the glucocorticoid receptor gene in offspring of Holocaust survivors, and prefrontal cortical dopamine transmission in alcoholism. Also, visit the online edition of this month's Journal and click "In This Issue" to view a video of Deputy Editor Daniel S. Pine, M.D., presenting highlights from the issue.

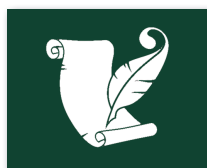

## Revisit the field's rich history!

### 25 years ago this month: Self-Defeating Personality Disorder and DSM-III-R: Development of the Diagnostic Criteria

One of the major controversies during the development of DSM-III-R was the possible inclusion of self-defeating personality disorder. The authors review the clinical literature that serves as the conceptual basis for this diagnosis. The development of the diagnostic criteria is described, including the rationale for specific criteria and the objections raised by opponents of the category. The authors describe how some of these objections led to changes in the diagnostic criteria in an attempt to distinguish self-defeating personality disorder from normal reactions to victimization and abuse.

# The Residents' JOURNAL

## The Residents' JOURNAL

a publication of  
The American Journal of Psychiatry

June 2014

Volume 9

Issue 6

### Inside

- 2 Molding the Future of Health Care  
Arshya Vahabzadeh, M.D.
- 3 Playing With Violence: Are Violent Video Games a Risk Factor for Violent Behaviors in Children?  
Holly S. Peek, M.D., M.P.H.
- 6 The Role of Media in Substance Use Among Adolescents and Young Adults  
Rajiv Radhakrishnan, M.B.B.S., M.D.
- 9 Suicide and Reporting in Mass Media  
Dorothy Chyung, M.D.
- 11 Television Reality: Perceptions of Mental Health in the Media  
Lubna Grewal, M.D.
- 12 The Psychiatrist as Advisor to the Media  
Daniel Bristow, M.D.
- 13 Scientology and Involuntary Commitment  
Robin Bershader, D.O., B. Samiyya Mushtaq, B.A., Abhinav Saxena, M.D.
- 15 Perils and Pitfalls for Psychiatrists Using Social Media  
Katherine Winner, M.D., Matthew Baker, D.O.
- 17 Author Information
- 17 Upcoming Themes

### In This Issue

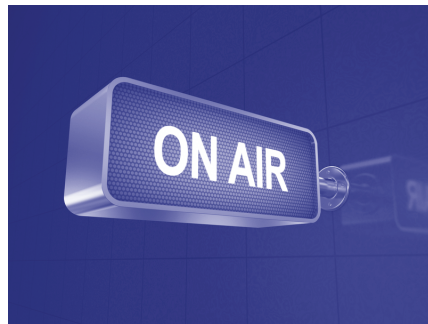

This issue of the *Residents' Journal* focuses on the theme of psychiatry and the media. Holly S. Peek, M.D., M.P.H., examines the evidence for exposure to violent video games as a risk factor for violence in children. Rajiv Radhakrishnan, M.B.B.S., M.D., discusses the role of the media with regard to substance use among adolescents and young adults. In a review article, Dorothy Chyung, M.D., investigates evidence regarding the relationship between suicide and its depiction in mass media. Lubna Grewal, M.D., discusses how mentally ill persons are portrayed in television dramas. Daniel Bristow, M.D., comments on the role of psychiatrists as advisors to the media. Lastly, Katherine Winner, M.D., and Matthew Baker, D.O., outline the unique ethical dilemmas pertaining to psychiatrists using social media.

Editor-in-Chief  
Arshya Vahabzadeh, M.D.

Deputy Editor  
Misty Richards, M.D., M.S.

Associate Editor  
David Hsu, M.D.

Guest Section Editor  
Holly S. Peek, M.D., M.P.H.

Editors Emeriti  
Sarah B. Johnson, M.D.  
Molly McVoy, M.D.  
Joseph M. Cerimele, M.D.  
Sarah M. Fayad, M.D.  
Morrita Seawell, M.D.

Staff Editor  
Angela Moore

### Editor-in-Chief

Misty Richards, M.D., M.S.

### Senior Deputy Editor

Rajiv Radhakrishnan, M.B.B.S., M.D.

### Deputy Editor

Tobias Wasser, M.D.

### Associate Editors

Ijeoma Chukwu, M.D., M.P.H.

Kathleen Mary Patchan, M.D.

### Media Editor

Holly S. Peek, M.D., M.P.H.

*The Residents' Journal* accepts manuscripts authored by medical students, resident physicians, and fellows. To submit your paper, please visit the manuscript submission site at [mc.manuscriptcentral.com/appi-ajp](http://mc.manuscriptcentral.com/appi-ajp) and either create an account or use your existing account. For manuscript type, select "Residents." Then follow the instructions to upload your manuscript. Residents who are interested in participating as Guest Section Editors should e-mail *The Residents' Journal* Editor-in-Chief Misty Richards at [misty.richards@gmail.com](mailto:misty.richards@gmail.com).

*The Residents' Journal* is sent free-of-charge to all psychiatry residents. Anyone interested in being included on the distribution list should contact Angela Moore, *The Residents' Journal* staff editor at [ajp@psych.org](mailto:ajp@psych.org) with "Subscribe to Residents' Journal" in the subject line.

To access the complete Residents' Journal archives, visit [ajp.psychiatryonline.org/residents\\_journal.aspx](http://ajp.psychiatryonline.org/residents_journal.aspx)

## Contents

- A1 **Editorial Board**  
A3 **Highlights of this issue**

### Editorials

- 1 **A neurobiological hypothesis for the classification of schizophrenia: type A (hyperdopaminergic) and type B (normodopaminergic)**  
O. D. Howes and S. Kapur

- 3 **Stages of Mental Illness – psychiatry in pictures**  
Lesley Harper

- 4 **Prescription of antipsychotics in people with dementia**  
C. Ballard, A. Corbett and R. Howard

- 6 **Use of medication for challenging behaviour in people with intellectual disability**  
G. Glover, S. Bernard, D. Branford, A. Holland and A. Strydom

### Review article

- 8 **Anti-basal ganglia antibodies in primary obsessive-compulsive disorder: systematic review and meta-analysis**  
D. M. Pearlman, H. S. Vora, B. G. Marquis, S. Najjar and L. A. Dudley

- 16 **The Man with the Wooden Leg – poem**  
Katherine Mansfield

### Papers

- 17 **Developmental pathways from childhood conduct problems to early adult depression: findings from the ALSPAC cohort**  
A. Stringaris, G. Lewis and B. Maughan
- 24 **Relationship between obesity and the risk of clinically significant depression: Mendelian randomisation study**  
C.-F. Hung, M. Rivera, N. Craddock, M. J. Owen, M. Gill, A. Korszun, W. Maier, O. Mors, M. Preisig, J. P. Rice, M. Rietschel, L. Jones, L. Middleton, K. J. Aitchison, O. S. P. Davis, G. Breen, C. Lewis, A. Farmer and P. McGuffin
- 29 **Brain-derived neurotrophic factor levels and bipolar disorder in patients in their first depressive episode: 3-year prospective longitudinal study**  
Z. Li, C. Zhang, J. Fan, C. Yuan, J. Huang, J. Chen, Z. Yi, Z. Wang, W. Hong, Y. Wang, W. Lu, Y. Guan, Z. Wu, Y. Su, L. Cao, Y. Hu, Y. Hao, M. Liu, S. Yu, D. Cui, L. Xu, Y. Song and Y. Fang
- 36 **Impact of depressive episodes on cognitive deficits in early bipolar disorder: data from the Systematic Treatment Optimization Programme for Early Mania (STOP-EM)**  
K. Muralidharan, I. J. Torres, L. E. Silveira, J.-M. Kozicky, J. Bucker, N. Fernando and L. N. Yatham

- 43 **Randomised controlled trials – in 100 words**  
John Geddes

- 44 **Comparative mortality risks of antipsychotic medications in community-dwelling older adults**

T. Gerhard, K. Huybrechts, M. Olfson, S. Schneeweiss, W. V. Bobo, P. M. Doraiswamy, D. P. Devanand, J. A. Lucas, C. Huang, E. S. Malka, R. Levin and S. Crystal

- 52 **Effects of a mindfulness-based psychoeducation programme for Chinese patients with schizophrenia: 2-year follow-up**

W. T. Chien and D. R. Thompson

- 60 **Insight, duration of untreated psychosis and attachment in first-episode psychosis: prospective study of psychiatric recovery over 12-month follow-up**

A. I. Gumley, M. Schwannauer, A. Macbeth, R. Fisher, S. Clark, L. Rattrie, G. Fraser, R. McCabe, A. Blair, K. Davidson and M. Birchwood

- 68 **Activity and views of service users involved in mental health research: UK survey**

S. Patterson, J. Trite and T. Weaver

### Columns

- 76 **Correspondence**  
79 **Contents of *Advances in Psychiatric Treatment***  
80 **Book review**  
81 **Contents of the *American Journal of Psychiatry***  
82 **From the Editor's desk**

### Cover picture

*Sean in Blue* (May 2012). Alexandra Long (b. 1988)

I am currently an FY1 doctor and previously worked within an acute in-patient psychiatric unit for working-age adults. As doctors, we face decisions that determine a patient's future quality of life and mortality, as well as dealing with the pressures of frequent examinations on our journey to consultancy. It is no wonder then that many doctors fall victim to work-related anxiety. I created this portrait to exemplify the isolation, intensity and severe stress that can typify this anxiety. I hope that in portraying psychiatric symptoms that many clinicians can relate to, the viewer is able to empathise more fully with the entire spectrum of mental health – from eccentricities and transient anxiety they may identify in their own lives, through to pathological symptoms. Perhaps if clinicians, both within and outside the field of psychiatry, could better identify these traits in themselves, they might also begin to consider their own patients' journeys and symptoms with more insight.

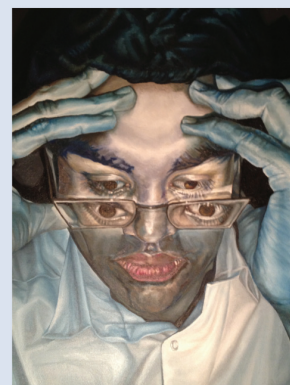

We are always looking for interesting and visually appealing images for the cover of the *Journal* and would welcome suggestions or pictures, which should be sent to Dr Allan Beveridge, British Journal of Psychiatry, 21 Prescot Street, London E1 8BB, UK or [bjp@rcpsych.ac.uk](mailto:bjp@rcpsych.ac.uk).
