# THE AMERICAN JOURNAL OF PSYCHIATRY

---

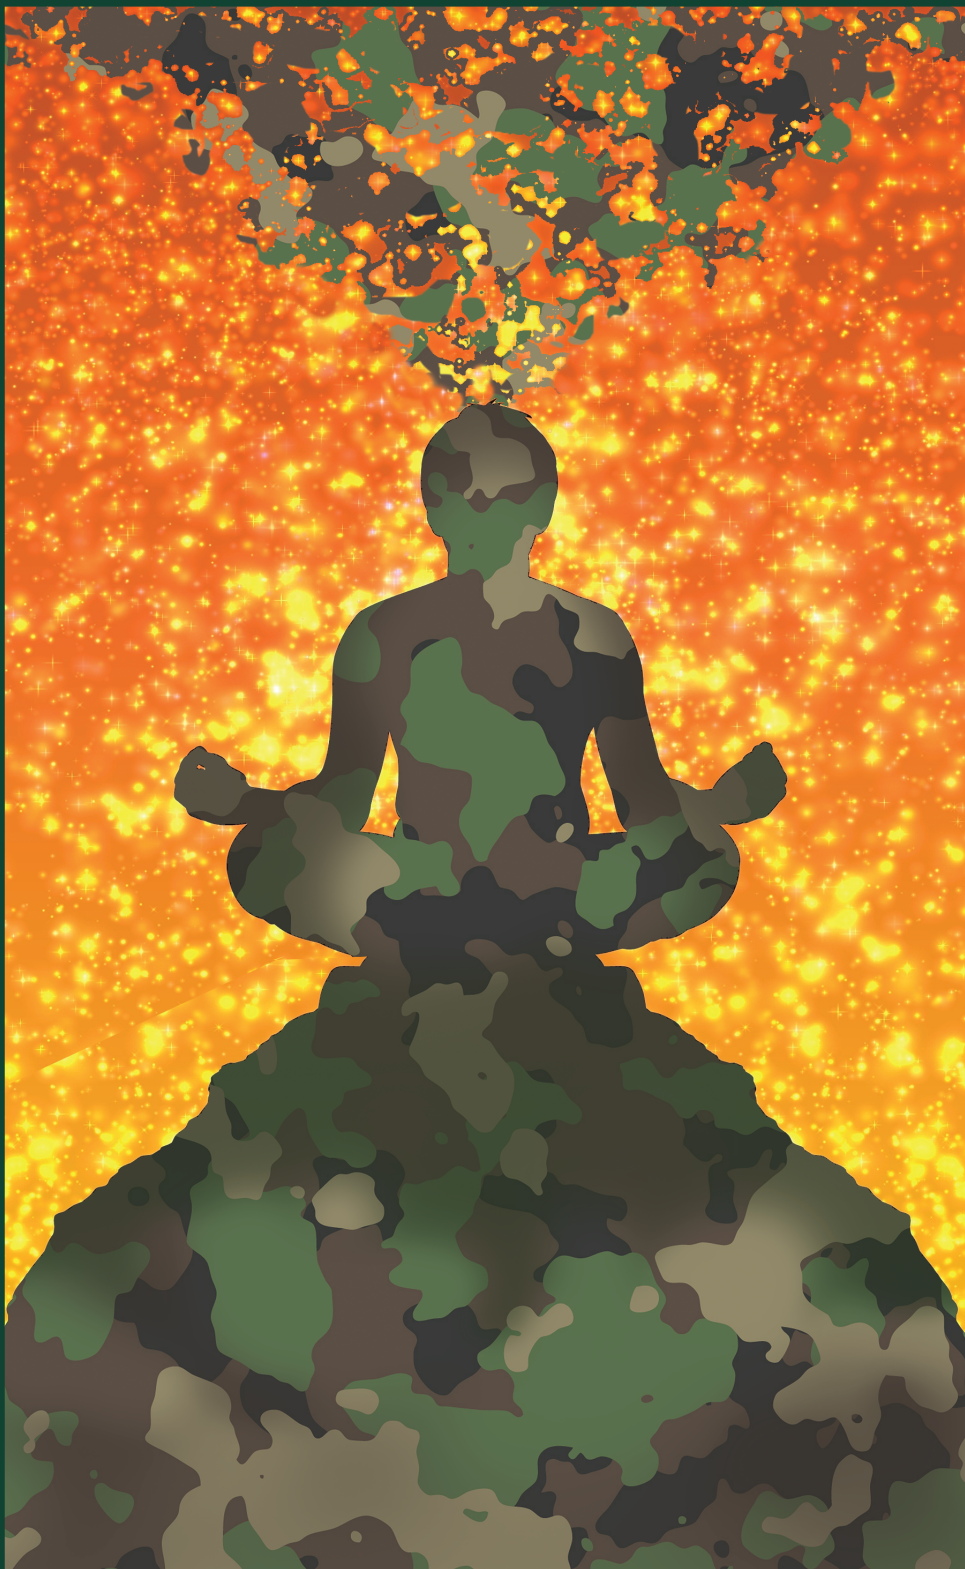

- ◀ **Modifying Resilience Mechanisms in At-Risk Individuals: A Controlled Study of Mindfulness Training in Marines Preparing for Deployment**  
Douglas C. Johnson, Ph.D., et al. 844
- The Burden of Loss: Unexpected Death of a Loved One and Psychiatric Disorders Across the Life Course in a National Study**  
Katherine M. Keyes, Ph.D., et al. 864
- Influences of Maternal and Paternal PTSD on Epigenetic Regulation of the Glucocorticoid Receptor Gene in Holocaust Survivor Offspring**  
Rachel Yehuda, Ph.D., et al. 872
- Decreased Prefrontal Cortical Dopamine Transmission in Alcoholism**  
Rajesh Narendran, M.D., et al. 881

**August 2014**

**Volume 171 • Number 8**

---

Official Journal of the  
AMERICAN PSYCHIATRIC ASSOCIATION

---

[ajp.psychiatryonline.org](http://ajp.psychiatryonline.org)
