# THE AMERICAN JOURNAL OF PSYCHIATRY

## En este número

A16

### Perspectivas

#### Editoriales

- 803 “Conciencia plena” (mindfulness) en las fuerzas armadas  
Judson Brewer [Audio](#)
- 807 Pérdida súbita y trastornos psiquiátricos en el transcurso de la vida: Hacia una teoría del desarrollo de los riesgos y la resiliencia relacionados con el duelo en el transcurso de la vida  
Julie B. Kaplow y Christopher M. Layne
- 811 Un estudio ingenioso de la transmisión intergeneracional de los efectos del TEPT  
David Spiegel [Audio](#)
- 814 Imágenes de las concentraciones de dopamina cortical, ¡por fin! Aplicación a la dependencia del alcohol  
Gwenn S. Smith

#### Comentario

- 818 Uso del Programa de evaluación de la discapacidad 2.0 de la OMS (WHODAS 2.0) para evaluar la discapacidad funcional asociada a los trastornos mentales para el DSM-5  
Brian Konecky, Eric C. Meyer, Brian P. Marx, Nathan A. Kimbrel, y Sandra B. Morissette

#### Conferencia de Caso Clínico

- 821 Delirium que se presenta como manía en un paciente con EPOC en fase terminal  
Samuel T. Wilkinson, Shin-Bey Chang, Teresa Foley, John R. Lipsey, y Dean F. MacKinnon [Audio](#) [Guías clínicas](#)

#### Perspectivas en Salud Mental Global

- 825 Depresión crónica en una mujer musulmana chiíta en Irán  
Sasan Vasegh [Audio](#)

#### Imágenes en Psiquiatría

- 827 Psicoterapia en el Bhagavad-guitá, el texto sagrado hindú  
Anand K. Pandurangi, Sudhakar Shenoy, y Matcheri S. Keshavan

## Resúmenes y Reseñas

- 829 Una valoración crítica de los estudios con neuroimágenes del trastorno bipolar: Hacia una nueva conceptualización de los circuitos neurales subyacentes y una guía para futuras investigaciones  
Mary L. Phillips y Holly A. Swartz

## Nuevas Investigaciones

### Artículos

- 844 Modificación de los mecanismos de resiliencia en personas en riesgo: Un estudio controlado de entrenamiento en “conciencia plena” (mindfulness) en infantes de marina que se preparan para un despliegue  
Douglas C. Johnson, Nathaniel J. Thom, Elizabeth A. Stanley, Lori Haase, Alan N. Simmons, Pei-an B. Shih, Wesley K. Thompson, Eric G. Potterat, Thomas R. Minor, y Martin P. Paulus [Audio](#) [Guías clínicas](#) [EMC](#) [Editorial](#) [Video](#)
- 854 Anomalías en la materia gris en el maltrato infantil: Un meta-análisis vóxel-a-vóxel  
Lena Lim, Joaquim Radua, y Katya Rubia [Video](#)
- 864 La carga de la pérdida: Muerte inesperada de un ser querido y trastornos psiquiátricos en el curso de la vida en un estudio nacional  
Katherine M. Keyes, Charissa Pratt, Sandro Galea, Katie A. McLaughlin, Karestan C. Koenen, y M. Katherine Shear [Audio](#) [EMC](#) [Editorial](#)
- 872 Influencias de TEPT materno y paterno en la regulación epigenética del gen receptor de glucocorticoides en los descendientes de un sobreviviente del Holocausto  
Rachel Yehuda, Nikolaos P. Daskalakis, Amy Lehrner, Frank Desarnaud, Heather N. Bader, Iouri Makotkine, Janine D. Flory, Linda M. Bierer, y Michael J. Meaney [Audio](#) [EMC](#) [Editorial](#) [Video](#)
- 881 Transmisión reducida de dopamina cortical prefrontal en el alcoholismo  
Rajesh Narendran, Neale Scott Mason, Jennifer Paris, Michael L. Himes, Antoine B. Douaihy, y W. Gordon Frankle [Audio](#) [Editorial](#)

## Comunicados y Actualizaciones

### Cartas al Editor

- 889** Cambios en EEG y en PET en la encefalitis del receptor del ácido anti-N-metil-D-aspartato  
Toxicidad de la serotonina en un metabolizador lento del CYP2D6 , inicialmente diagnosticado como una depresión mayor resistente a la medicación  
Intento de suicidio por intoxicación de nicotina utilizando líquido de nicotina para uso en cigarrillos electrónicos
- 892** Libros Recibidos

### Otros Temas de Interés

- 893** Educación Médica Continua  
**A9** Directivos de la American Psychiatric Association  
**A11** Calendario  
**A14** Contenidos del *British Journal of Psychiatry*

### Cubierta

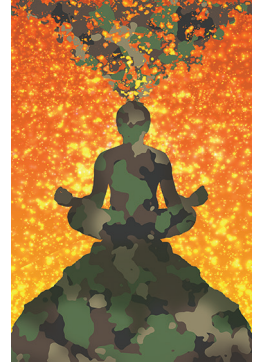

|                       |                                                                                                                                |
|-----------------------|--------------------------------------------------------------------------------------------------------------------------------|
| <b>Audio</b>          | artículo en AJP Audio: archivo .mp3 descargable de <a href="http://ajp.psychiatryonline.org">ajp.psychiatryonline.org</a>      |
| <b>Guías clínicas</b> | este artículo ofrece guías clínicas (ver pagina "En este Número" o al final del artículo)                                      |
| <b>EMC</b>            | existe un curso en línea que cubre los contenidos de este artículo para los suscriptores del programa de cursos de EMC del AJP |
| <b>Editorial</b>      | este artículo se discute en uno de los editoriales de este numero                                                              |

La Tabla de Contenidos de Este Número Está Disponible en Español  
*(This issue's Table of Contents is available in Spanish)*

Presented in collaboration with the Office of Global Health, UMDNJ-Robert Wood Johnson Medical School

Translation courtesy of

Sergi Casals, M.A.  
*Garuna, Medellin, Colombia (www.garunaeditors.com)*

Carlos Lopez Jaramillo, M.D.  
*Universidad de Antioquia, Medellin, Colombia*

Javier I. Escobar, M.D., M.Sc.  
*UMDNJ-Robert Wood Johnson Medical School*

Consulte *The American Journal of Psychiatry* en línea en [ajp.psychiatryonline.org](http://ajp.psychiatryonline.org)

**NEW**

Also Included: Translations of selected abstracts!  
*(Support for this effort provided by AstraZeneca-Colombia.)*

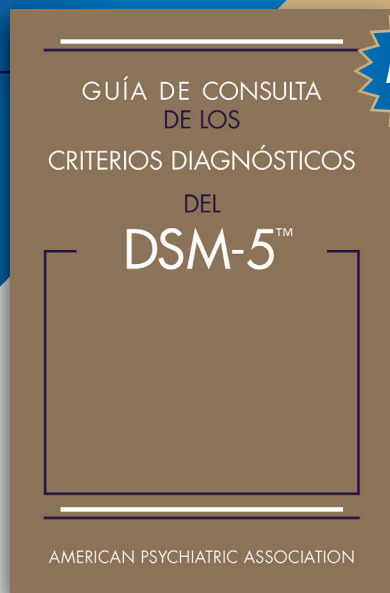

**Nuevo!**

## Guía de consulta de los criterios diagnósticos del DSM-5™

**Spanish Edition of the Desk Reference to the Diagnostic Criteria From DSM-5™**

American Psychiatric Association

La Guía de consulta de los criterios diagnósticos del DSM-5™ es una ayuda concisa y asequible para la referencia psiquiátrica fundamental, el DSM-5™. Incluye la clasificación diagnóstica completa revisada, así como todos los criterios diagnósticos del DSM-5™ en un formato fácil de utilizar. Esta cómoda referencia proporciona un acceso rápido a la información esencial para emitir un diagnóstico. Diseñado como complemento del DSM-5™, esta cómoda guía ayudará a los profesionales de la salud mental a incorporar los criterios diagnósticos del DSM-5™ en sus diagnósticos.

El Manual diagnóstico y estadístico de los trastornos mentales es la máxima referencia autorizada para la práctica clínica en el campo de la salud mental. Los cambios estructurales y diagnósticos de la quinta edición son un material que todos los clínicos "deben conocer". La Guía de consulta de los criterios diagnósticos del DSM-5™ condensa la información diagnóstica actualizada esencial de este manual para ofrecer a los clínicos un recurso inestimable para diagnosticar con eficacia los trastornos mentales, desde el de mayor prevalencia al menos frecuente.

2014 • 490 pages • ISBN 978-0-89042-551-0 • Paperback • \$69.00 • Item #2551

*También disponible en Español*

### Aplicación para celular de los Criterios Diagnósticos del DSM-5™

La Aplicación Móvil de Criterios Diagnósticos DSM-5™ proporciona a los profesionales, investigadores y estudiantes de la salud mental un rápido acceso a códigos y criterios vitales de DSM para que puedan integrar por completo los nuevos datos en su práctica y sus estudios. Los usuarios tienen acceso completo fuera de línea a todos los conjuntos de criterios, además de acceso en línea a vídeos, comentarios y recursos de apoyo. Sus poderosas herramientas de personalización y de búsqueda ayudan y mejoran la valoración de las presentaciones de los síntomas en diversos entornos clínicos y administrativos.

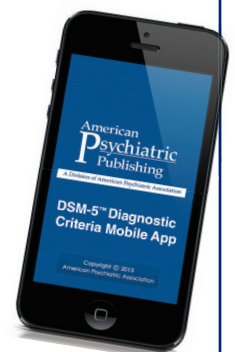

Ahora disponible para dispositivos iOS y Android.

### Una valoración crítica de los estudios con neuroimágenes del trastorno bipolar: Hacia una nueva conceptualización de los circuitos neurales subyacentes y una guía para futuras investigaciones

Mary L. Phillips, M.D.  
Holly A. Swartz, M.D.

**Objetivo:** En esta revisión crítica, los autores evalúan hallazgos en estudios con neuroimágenes del trastorno bipolar en los circuitos neurales del procesamiento de emociones, de la regulación de emociones y del procesamiento de recompensas, con el fin de sintetizar el conocimiento actual sobre las bases neurales del trastorno bipolar y ofrecer una guía sobre la investigación con neuroimágenes para futuros estudios.

**Método:** Los autores examinaron hallazgos de todos los principales estudios en trastorno bipolar que utilizaron análisis volumétrico, imágenes de difusión y técnicas para estudiar el estado de reposo en resonancias magnéticas funcionales, e integraron todos los hallazgos para ofrecer una mejor comprensión de las anomalías a mayor escala en los circuitos neurales en trastorno bipolar.

**Resultados:** El trastorno bipolar se puede conceptualizar, en términos de circuitos neurales, como disfunción paralela en los circuitos corticales prefrontales (especialmente corticales prefrontales ventrolaterales) de procesamiento y de regulación de emociones en el hipocampo y la amígdala bilateralmente, junto con una “sobreactividad” en los circuitos corticales orbitofrontales y ventrales estriatales-ventrolaterales del lado izquierdo, cuyo resultado son anomalías características del comportamiento, asociadas con el trastorno bipolar: labilidad emocional, disregulación emocional y sensibilidad aumentada a las recompensas. Una base estructural potencial de estas anomalías funcionales es la reducción de materia gris en las cortezas prefrontal y temporal, la amígdala y el hipocampo, y la reducción de anisotropía fraccional en los tractos de materia blanca que conectan las regiones prefrontal y subcortical.

**Conclusiones:** Los estudios con neuroimágenes de trastorno bipolar demuestran claramente que hay anomalías en los circuitos neurales que apoyan el procesamiento de emociones, la regulación de emociones y el procesamiento de recompensas, aunque dichos estudios tienen ciertas limitaciones. Las futuras investigaciones de trastorno bipolar deben incluir estudios que adopten enfoques dimensionales; estudios más grandes que examinen las trayectorias del neurodesarrollo en jóvenes con trastorno bipolar o en riesgo de trastorno bipolar; estudios multimodales con neuroimágenes, que utilicen enfoques de sistemas integrados; y estudios que utilicen enfoques de reconocimiento de patrones para ofrecer datos clínicos útiles a nivel individual. Dichos estudios ayudarán a identificar biomarcadores clínicamente relevantes para orientar el diagnóstico y decidir el tratamiento para personas con trastorno bipolar.

*(Am J Psychiatry 2014; 171:829–843)*

## Modificación de los mecanismos de resiliencia en personas en riesgo: Un estudio controlado de entrenamiento en “conciencia plena” (mindfulness) en infantes de marina que se preparan para un despliegue

Douglas C. Johnson, Ph.D.  
Nathaniel J. Thom, Ph.D.  
Elizabeth A. Stanley, Ph.D.  
Lori Haase, Ph.D.  
Alan N. Simmons, Ph.D.  
Pei-an B. Shih, Ph.D.  
Wesley K. Thompson, Ph.D.  
Eric G. Potterat, Ph.D.  
Thomas R. Minor, Ph.D.  
Martin P. Paulus, M.D.

**Objetivo:** El despliegue militar puede tener efectos profundos en la salud física y mental. Pocos estudios han examinado si las intervenciones previas al despliegue pueden mejorar los mecanismos que subyacen a la resiliencia. Se ha demostrado que las técnicas basadas en la “conciencia plena” ayudan a recuperarse del estrés y pueden afectar las relaciones entre el cerebro y el comportamiento antes del despliegue. Los autores examinaron el efecto que el entrenamiento en “conciencia plena” tiene en los mecanismos de resiliencia en in-

fantes de marina en servicio activo que se preparan para el despliegue.

**Método:** Se seleccionaron aleatoriamente 8 pelotones de la infantería de marina (N=281). Cuatro pelotones fueron asignados para recibir entrenamiento en “conciencia plena” (N=147) y cuatro fueron asignados para recibir el tratamiento habitual, como grupo control. Se evaluó a los pelotones en el momento de inicio del estudio, 8 semanas después, y durante y después de una sesión estresante de entrenamiento de combate, aproximadamente 9 semanas después de haber iniciado el estudio. El entrenamiento en “conciencia plena” se ofreció en forma de un entrenamiento para el equilibrio mental basado en la conciencia plena (Mindfulness-Based Mind Fitness Training, MMFT) de 8 semanas, un programa que incluye 20 horas de instrucción en clase y, adicionalmente, ejercicios de tarea diarios. El MMFT enfatiza la conciencia interoceptiva, el control de la atención y la tolerancia de las experiencias del momento actual. Las principales medidas resultantes

fueron el ritmo cardíaco, el ritmo respiratorio, la concentración del plasma de neuropéptido-Y, el puntaje en la Escala de Respuesta a Experiencias Estresantes y la activación cerebral medida por resonancia magnética funcional.

**Resultados:** Los infantes de marina que recibieron MMFT mostraron mayor reactividad (ritmo cardíaco [d=0.43]) y recuperación mejorada (ritmo cardíaco [d=0.67], ritmo respiratorio [d=0.93]) después de entrenamiento estresante; menor concentración del plasma de neuropéptido-Y después de entrenamiento estresante (d=0.38); y señal dependiente del nivel de oxígeno en la sangre atenuada en la ínsula derecha y el giro cingulado anterior.

**Conclusiones:** Los resultados muestran que los mecanismos relacionados con la recuperación del estrés pueden ser modificados en individuos sanos antes de la exposición al estrés, con implicaciones importantes para la investigación en salud mental basada en la evidencia y para el tratamiento.

(Am J Psychiatry 2014; 171:844–853)

## Anomalías en la materia gris en el maltrato infantil: Un meta-análisis vóxel-a-vóxel

Lena Lim  
Joaquim Radua, M.D.  
Katya Rubia, Ph.D.

**Objetivo:** El maltrato infantil actúa como un factor de estrés severo cuyo resultado es una secuencia de cambios fisiológicos y neurobiológicos que conducen a alteraciones perdurables en la estructura cerebral. Sin embargo, los hallazgos de los estudios con neuroimágenes estructurales han sido inconsistentes. Los autores hicieron un meta-análisis de estudios de morfometría basada en vóxel del cerebro completo que están publicados sobre el maltrato infantil, para dilucidar las anomalías más robustas en el volumen de materia gris.

**Método:** Se incluyeron 12 conjuntos de datos, que comprendían 331 sujetos

(56 niños/adolescentes y 275 adultos) con historial de maltrato infantil y 362 sujetos de comparación (56 niños/adolescentes y 306 adultos). Para examinar regiones de mayor y menor volumen de materia gris en sujetos maltratados y en sujetos de comparación se utilizó el mapeo anisotrópico diferencial firmado a través de tamaño de efecto (effect size-signed differential mapping), un método meta-analítico basado en vóxel.

**Resultados:** En relación a los sujetos de comparación, los sujetos que habían sido expuestos a maltrato infantil exhibieron volúmenes de materia gris significativamente inferiores en el giro temporal orbitofrontal/superior que se extendía a la amígdala, la ínsula y los giros parahipocámpal y temporal medial, y en los giros frontal inferior y postcentral izquierdos. Se encontró un mayor volumen de materia gris en los giros frontal superior

y occipital medial izquierdo. En el análisis de un subgrupo de participantes no medicados se observaron déficits en las regiones orbitofrontal-temporal-límbica derecha y frontal inferior izquierda. Se encontraron anomalías en los giros postcentral izquierdo y occipital medial sólo en personas mayores que habían recibido maltrato, en relación a sujetos de comparación de la misma edad.

**Conclusiones:** Los hallazgos demuestran que las anomalías más consistentes en la materia gris en individuos expuestos a maltrato infantil se encuentran en las regiones prefrontales-límbicas-temporales ventrolaterales que se desarrollan relativamente tarde y que se sabe que median las funciones de control cognitivo y de afecto, que tienen un desarrollo tardío y que típicamente están comprometidas en esta población.

(Am J Psychiatry 2014; 171:854–863)

## La carga de la pérdida: Muerte inesperada de un ser querido y trastornos psiquiátricos en el transcurso de la vida en un estudio nacional

Katherine M. Keyes, Ph.D.  
Charissa Pratt, M.P.H.  
Sandro Galea, M.D., Dr.P.H.  
Katie A. McLaughlin, Ph.D.  
Karestan C. Koenen, Ph.D.  
M. Katherine Shear, M.D.

**Objetivo:** La muerte inesperada de un ser querido es algo común y se asocia con subsiguientes elevaciones de síntomas de múltiples formas de psicopatología. Determinar si esta experiencia predice el inicio por primera vez de trastornos psiquiátricos y si estas asociaciones varían en el transcurso de la vida tiene implicaciones clínicas importantes. Los autores examinaron asociaciones entre la muerte inesperada de un ser querido y el inicio por primera vez de trastornos comunes de ansiedad, de ánimo y de uso de sustancias en una muestra basada en la población.

**Método:** La relación entre la muerte inesperada de un ser querido y el inicio por primera vez de trastornos del DSM-IV de por vida se estimó utilizando una entrevista estructurada de adultos en la población general de Estados Unidos (tamaño de la muestra de análisis=27.534). En los modelos se controlaba la existencia de algún trastorno anterior, de otras experiencias traumáticas y las variables demográficas.

**Resultados:** La muerte inesperada de un ser querido fue la experiencia traumática más común y la que tenía una mayor probabilidad de ser considerada como la peor experiencia por parte de las personas que respondieron la encuesta, independientemente de otras experiencias traumáticas que pudieran haber sufrido. Se observó que, después de la muerte inesperada, había una incidencia aumentada en casi todos los momentos del transcurso de la vida para

episodio depresivo, trastorno de pánico y trastorno por estrés post-traumático. En grupos de adultos mayores, se encontró incidencia aumentada para episodio maníaco, fobias, trastornos de uso de alcohol y trastorno de ansiedad generalizada.

**Conclusiones:** El período de duelo está asociado con un riesgo elevado del inicio de múltiples trastornos psiquiátricos, consistentemente a lo largo de todo el transcurso de la vida y que coinciden con la experiencia de la muerte del ser querido. Las nuevas asociaciones entre la muerte inesperada y el inicio de varios trastornos, incluyendo la manía, confirman múltiples informes de casos y resultados de estudios pequeños y sugieren una área emergente importante para la práctica y la investigación clínicas.

(*Am J Psychiatry* 2014; 171:864–871)

## Influencias de TEPT materno y paterno en la regulación epigenética del gen receptor de glucocorticoides en los descendientes de un sobreviviente del Holocausto

Rachel Yehuda, Ph.D.  
Nikolaos P. Daskalakis, M.D., Ph.D.  
Amy Lehrner, Ph.D.  
Frank Desarnaud, Ph.D.  
Heather N. Bader, B.S.  
Iouri Makotkine, M.D.  
Janine D. Flory, Ph.D.  
Linda M. Bierer, M.D.  
Michael J. Meaney, Ph.D.

**Objetivo:** Se han observado efectos diferenciales del trastorno por estrés post-traumático materno y paterno en descendientes adultos de sobrevivientes del Holocausto, tanto en la sensibilidad de los receptores de glucocorticoides como en la vulnerabilidad a trastornos psiquiátricos. Los autores examinaron las influencias relativas del trastorno por estrés post-traumático materno y paterno en la metilación del ADN del promotor del exón 1F del gen NR3C1 receptor de glucocorticoides (GR-1F), en las células sanguíneas mononucleares periféricas y su relación con la sensibili-

dad del receptor de glucocorticoides en los descendientes del Holocausto.

**Método:** Los descendientes adultos que tienen como mínimo uno de los padres que es sobreviviente del Holocausto (N=80) y otros participantes demográficamente similares y cuyos padres no estuvieron expuestos al Holocausto o no tenían TEPT (N=15), respondieron entrevistas clínicas, y completaron medidas de auto-informe y procedimientos biológicos. Se tomaron muestras de sangre para el análisis tanto de la metilación del promotor del GR-1F como de los niveles de cortisol en respuesta a dexametasona en dosis bajas, y se llevó a cabo un análisis de covarianza bidireccional que tenía el TEPT materno y paterno como efectos principales. Se utilizó el análisis de agrupamiento jerárquico para permitir la visualización de los efectos del TEPT materno comparados con los del TEPT paterno, los efectos en las variables clínicas y la metilación del promotor del GR-1F.

**Resultados:** Una interacción significativa demostró que en ausencia de TEPT materno, los descendientes con TEPT paterno mostraban una mayor metilación del promotor del GR-1F, mientras que los descendientes con TEPT materno y paterno mostraron menos metilación. La menor metilación del promotor del GR-1F se asoció de manera significativa con una mayor supresión de cortisol post dexametasona. El análisis de agrupamiento reveló que los efectos del TEPT materno y paterno estaban asociados de manera diferencial con indicadores clínicos y con la metilación del promotor del GR-1F.

**Conclusiones:** Este es el primer estudio que da evidencia de alteraciones de la metilación del promotor del GR-1F en relación al TEPT de los padres y de resultados neuroendocrinos. La moderación de los efectos del TEPT de los padres sugiere diferentes mecanismos para la transmisión intergeneracional de vulnerabilidades relacionadas con los traumas.

(*Am J Psychiatry* 2014; 171:872–880)

## Transmisión reducida de dopamina cortical prefrontal en el alcoholismo

Rajesh Narendran, M.D.  
Neale Scott Mason, Ph.D.  
Jennifer Paris, M.Ed., M.S.L.  
Michael L. Himes, B.S.  
Antoine B. Douaihy, M.D.  
W. Gordon Frankle, M.D.

**Objetivo:** Estudios básicos han demostrado que los niveles óptimos de dopamina en la corteza prefrontal son críticos para varias funciones ejecutivas como la memoria de trabajo, la atención, el control inhibitorio y las decisiones de riesgo/recompensa, todas las cuales se deterioran en los trastornos adictivos como el alcoholismo. A partir de esta información y de estudios con neuroimágenes sobre alcoholismo que han demostrado que hay menos dopamina en el cuerpo estriado, la hipótesis

de los autores es una reducción de la transmisión de dopamina en la corteza prefrontal en personas con dependencia del alcohol.

**Método:** Para probar esta hipótesis, se utilizaron tomografía por emisión de positrones [<sup>11</sup>C]FLB 457 y anfetamina para medir la transmisión de dopamina cortical en 21 personas recientemente abstinentes con dependencia del alcohol y en 21 sujetos sanos de comparación. El potencial de ligamiento de [<sup>11</sup>C]FLB 457, específico comparado con la captación no desplazable se midió en sujetos con análisis cinético utilizando la función de entrada arterial antes y después de 0.5 mg kg<sup>-1</sup> de *d*-anfetamina.

**Resultados:** El desplazamiento del potencial de ligamiento de [<sup>11</sup>C]FLB 457 inducido por anfetaminas ( $\Delta$ BPND) fue

significativamente inferior en las regiones corticales en el grupo dependiente del alcohol comparado con el grupo sano de comparación. Las regiones corticales en las que se observó una menor transmisión de dopamina en el grupo dependiente del alcohol incluían la corteza prefrontal dorsolateral, la corteza frontal orbital, la corteza temporal y el lóbulo temporal medial.

**Conclusiones:** Los resultados de este estudio, por primera vez, demuestran de forma inequívoca una transmisión reducida de dopamina en la corteza en el alcoholismo. Es necesario hacer más investigación para comprender la relevancia clínica de la dopamina cortical reducida y ver si está relacionada con la función ejecutiva deteriorada, la recaída, y el resultado en alcoholismo.

*(Am J Psychiatry 2014; 171:881–888)*
